# Supplementary material
Source: Springer Nature journal article supplement (https://www.springermedizin.de/resource/supplementary/13051_2010_117_MOESM2_ESM.pdf/9669974)

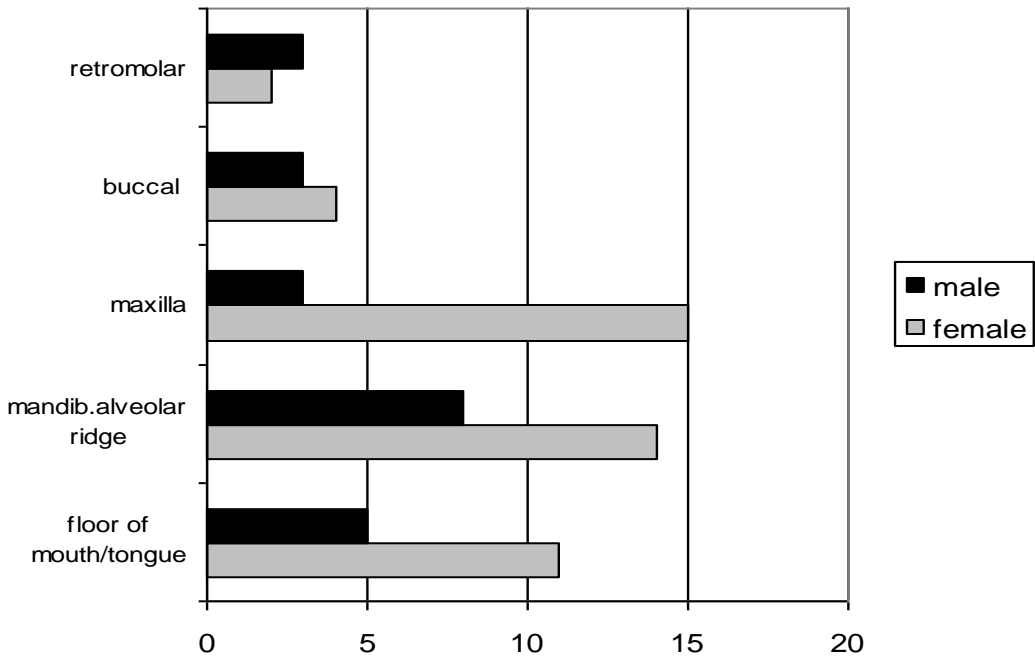

Supplement: MOESM2 [file 9669974]
